# Supplementary material
Source: publisher figshare collection journal article supplement (https://sage.figshare.com/ndownloader/files/22676528)
Supplement: Supplementary file 1 [file 22676528]

**Table 1.** Differential diagnoses of peripheral neuropathy in lymphoma.

- Neoplastic infiltration
  - Neurolymphomatosis
  - Leptomeningeal disease
  - Perineural spread
- Radiation related plexopathy
- Neurotoxicity from chemotherapeutic agents. Eg: vinca alkaloids
- Autoimmune etiology
  - Vasculitis
  - Paraneoplastic
- Infections
  - Infective neuropathy (Herpes zoster)
  - Acquired immunodeficiency syndrome
- Miscellaneous conditions
  - Spinal cord or nerve root compression from adjacent mass
  - Inflammatory conditions Eg:including neurosarcoidosis, Lyme's disease
  - Chronic inflammatory demyelinating polyneuropathy (CIDP)
  - Guillain-Barré Syndrome (GBS)
  - Hereditary neuropathies
  - Paraproteinemia
  - Amyloidosis
  - Metabolic and nutrient deficiencies
